# Supplementary material for: One-pot high yield synthesis of Ag nanoparticle-embedded biochar hybrid materials from waste biomass for catalytic Cr(vi) reduction
Source: Royal Society of Chemistry journal article supplement (doi:10.1039/c6en00109b), 2016-01-01
Supplement: c6en00109b1.pdf [file c6en00109b1.pdf]

## **Supporting Information**

**For**

### **One-Pot High Yield Harvest of Ag Nanoparticles Embedded Biochar Hybrid Materials from Waste Biomass for Catalytic Cr(VI) Reduction**

Wu-Jun Liu, LiLi Ling, Yuan-Ying Wang, Hui He, Yan-Rong He, Han-Qing Yu and  
Hong Jiang\*

CAS Key Laboratory of Urban Pollutant Conversion, Department of Chemistry,  
University of Science and Technology of China, Hefei 230026, China

**Table S1.** The elemental compositions (C, H, N, O) of the pure biochar, Ag@biochar, and spent Ag@biochar

|                  | C (wt.%) | H (wt.%) | N (wt.%) | O (wt.%) |
|------------------|----------|----------|----------|----------|
| Biochar          | 79.9     | 3.1      | 0.4      | 16.1     |
| Ag@biochar       | 81.0     | 2.6      | 0.7      | 14.3     |
| Spent Ag@biochar | 77.0     | 2.8      | 0.3      | 16.2     |

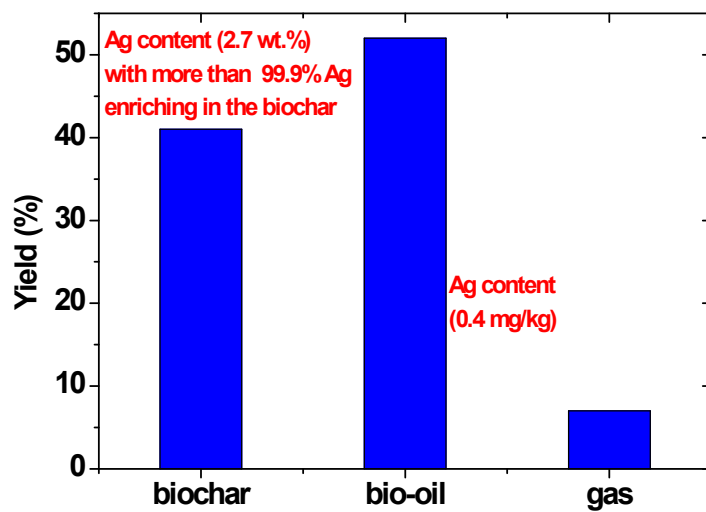

**Fig. S1.** The yields of biochar, bio-oil, and gas during the pyrolysis of the Ag polluted biomass, as well as the Ag contents in the biochar and bio-oil.

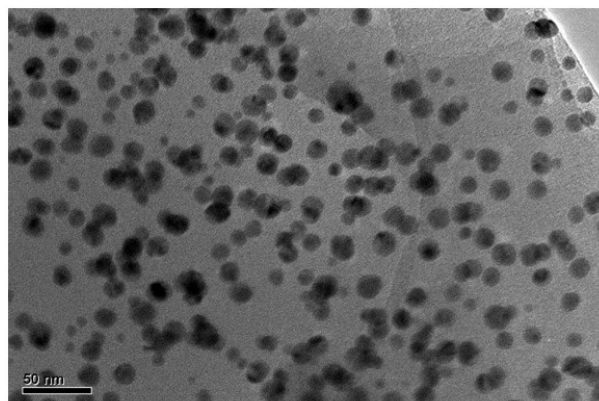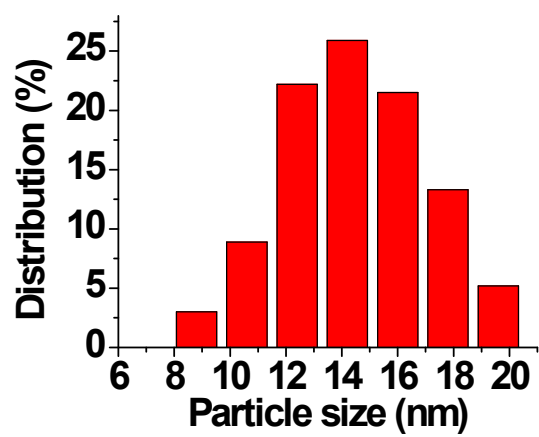

**Fig. S2.** The TEM image of the Ag@biochar synthesized from NaBH<sub>4</sub> reduction, and the Ag particle size distribution

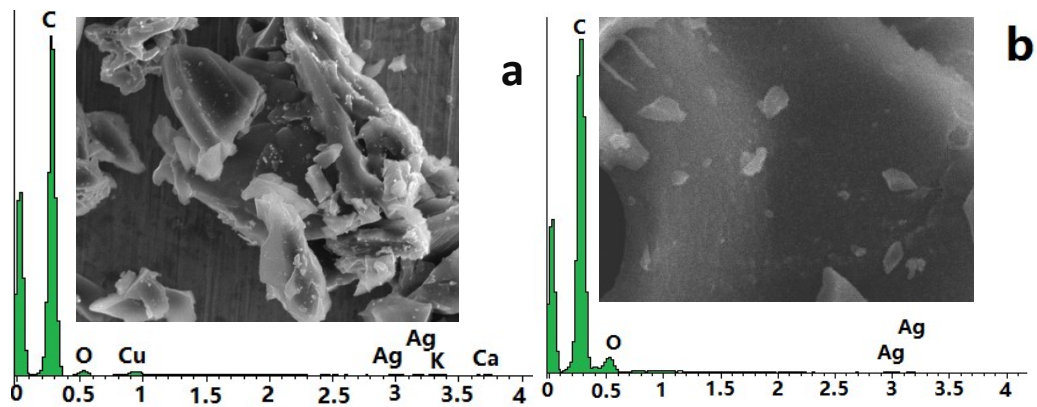

**Fig. S3.** The SEM-EDS of the Ag@biochar-600 and Ag@cellulose-biochar-600 samples

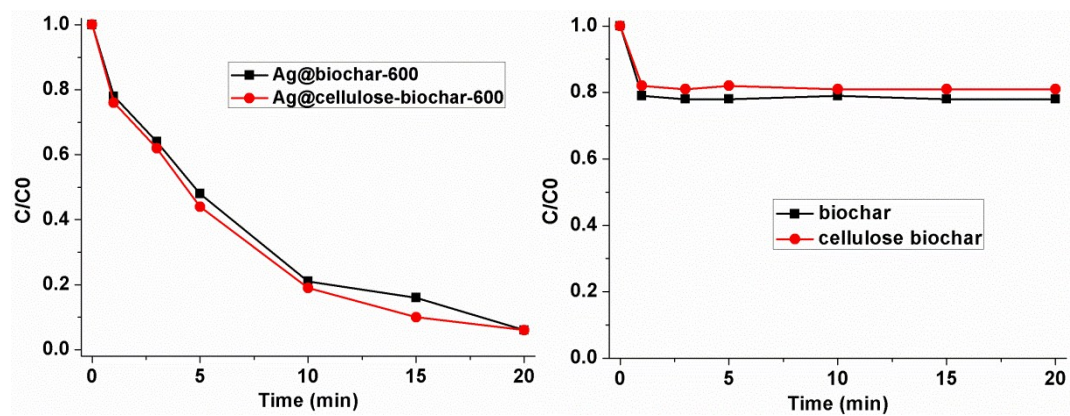

**Fig. S4.** Comparison of the catalytic performance of the biochar derived from biomass and cellulose and biochar supported Ag NPs.

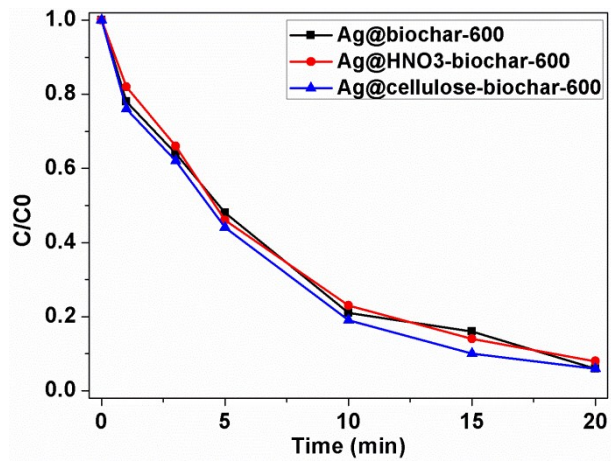

**Fig. S5.** Comparison of the catalytic performance of different biochar support Ag NPs.
